# Supplementary material
Source: MDPI journal article supplement (https://www.mdpi.com/2073-4395/14/2/258)
Supplement: s1 [file s1]

**Table S1** Primers used in RT-qPCR

| Gene             | GenBank accession | Primer sequence (5'→3')                                     | Fragment length (bp) |
|------------------|-------------------|-------------------------------------------------------------|----------------------|
| <i>β-actin</i>   | KJ018754.1        | F- GGGAGTCATGGTTGGTATGG<br>R- TCCATATCGTCCCAGTTGGT          | 126                  |
| <i>CYP380C12</i> | MT268652.1        | F- GATGATTGGTGGTAGTGAAA<br>R- AATAATGGTGCTGTAGGGTA          | 216                  |
| <i>CYP6DAI</i>   | KX945359.1        | F- CGTAGAAGTCATCCATTTCGCTG<br>R- GCTTTCCACTGATCTCCTCG       | 225                  |
| <i>CYP6DA2</i>   | MF471386.1        | F- AAACACAGAATACCAACGAG<br>R- ACCTAAATAAGTCCACAAGC          | 113                  |
| <i>CYP4G15</i>   | MF471388.1        | F- CACCTATTTAAATGTGGATCGGGCC<br>R- CGATCAATTTTCTGTGGGCTCTC  | 189                  |
| <i>CYP4CK1</i>   | MF471405.1        | F- CTATTTTGCCGGGGACATCG<br>R- TCGGTCCTGCACTAAATGGT          | 175                  |
| <i>CYP6CY7</i>   | MF471381.1        | F- CTGATGTTACGCGATCCAGAGCT<br>R- GATCTGTTTCATGCGTGTCTT      | 207                  |
| <i>CYP6CY18</i>  | MF471377.1        | F- CAGGTGAAGGAGTGCAGCGA<br>R- GAGTTTGGACCTCAGCGACGG         | 215                  |
| <i>CYP6CY19</i>  | KX945360.1        | F- GATTCTTCTGTTTGTGCGCCGGTG<br>R- GGGTAAGTCTTAGTTGCTTCTC    | 197                  |
| <i>CYP4CJ5</i>   | MT268653.1        | F- CTCATCAACGCATCAGACAATGG<br>R- CTCTGCCAATATTACTAAGGTTG    | 157                  |
| <i>CYP6CY22</i>  | KX950717.1        | F- GATGTACTACTTATATCCGAACGCC<br>R- GTGTCCTTTAGCTTTCCAGATGTG | 255                  |
| <i>CYP380C6</i>  | MF471383.1        | F- CAAGGCCCTGGAGAAAGACC<br>R- GGTGTCCGCTATATAGTCCCAAAG      | 211                  |
| <i>CYP6CY14</i>  | MF687493.1        | F- GATGGTTGGCTTAGAACGGC<br>R- TCGTCAATGTCTATACCGTGG         | 186                  |
| <i>CYP6A14</i>   | KR028424.1        | F- CGGTGCTCAATTCTTCTCCG<br>R- ATAAAGTCATTCCGGCGCAC          | 181                  |
| <i>CYP6CY13</i>  | MF471380.1        | F- CCGGAACCTCATAAACAACG<br>R- ATCGTGACGTCGAACTGATC          | 244                  |
| <i>CYP305E1</i>  | MF471390.1        | F- GACTCAGGACAATGGGTAAACG<br>R- CTTAGTGCCCGCTGTCAGTTCC      | 251                  |
| <i>CYP3323AI</i> | KY827388.1        | F- CCCGAGCCTGAAGAGTTCCA<br>R- TGACCACCTTCAAGCGTACT          | 238                  |
| <i>CYP18AI</i>   | MF471394.1        | F- TGGCGCTCAGATCATACCTT<br>R- TTCTCCGACCAACTCCGAAA          | 152                  |
| <i>CYP6DBI</i>   | MF471384.1        | F- TGCCGCACCGCTATTATTAC<br>R- GAAATTCAATCGGCGGTCCA          | 230                  |
| <i>CYP6G1</i>    | JN989967.1        | F- GGTGCGCGATCCTGAAATAA<br>R- CGCCACACTCTTCGATTGTA          | 235                  |
| <i>CYP6CY5</i>   | MF471387.1        | F- GACACCTGGTTTCACATCGG<br>R- TGGTGTCCAACCTTGAGTCCA         | 191                  |
| <i>CYP4CH1</i>   | MF443134.1        | F- ACCATCATGATTGGAGGCCA<br>R- GGGCAAAGGAGGGAACAATC          | 222                  |
| <i>CYP4CJ2</i>   | MF471385.1        | F- TCTGGGACGAGATGCTGTT<br>R- GTTCAGCCACGGTTTCAACA           | 227                  |
| <i>CYP6CY21</i>  | MT268677.1        | F- TTGACAAAACCTGTTGGGAATC<br>R- GAAGGAACATCAGAATCGCA        | 223                  |
| <i>CYP315A1</i>  | MF471375.1        | F- TGCAGTGGTGATACTACTG<br>R- GGTGCCAACGGATACATTCT           | 171                  |
| <i>CYP6CY4</i>   | MF687492.1        | F- TGGGAAAAGCTCAATGTGCC<br>R- AGGCGTCTCATCTGAAACA           | 159                  |
| <i>CYP306A1</i>  | MF471382.1        | F- GTGCACAAATGGCGGGATAA<br>R- ATGCGGTATCCCTCAAGTGT          | 153                  |
